# Supplementary material for: Bottles as models: predicting the effects of varying swimming speed and morphology on size selectivity and filtering efficiency in fishes
Source: Oxford University Press journal article supplement (doi:10.1242/jeb.048702), 2011-04-27
Supplement: jeb048702tables1.pdf [file jeb048702tables1.pdf]

Table S1. Size and swimming speed of a variety of fish species

| Species                       | Total length or fork length (cm) | Swimming speed (cm s <sup>-1</sup> ) | Swimming speed (BL s <sup>-1</sup> ) | Reference                 |                          |
|-------------------------------|----------------------------------|--------------------------------------|--------------------------------------|---------------------------|--------------------------|
| <b>Elasmobranchs</b>          |                                  |                                      |                                      |                           |                          |
| <i>Sphyrna lewini</i>         | 52                               | 47.6                                 | 0.91                                 | Lowe (1996)               |                          |
|                               | 59                               | 56.2                                 | 0.95                                 | Lowe (1996)               |                          |
|                               | 52                               | 56.6                                 | 1.09                                 | Lowe (1996)               |                          |
|                               | 53                               | 57.5                                 | 1.26                                 | Lowe (1996)               |                          |
|                               | 60                               | 83.1                                 | 1.07                                 | Lowe (1996)               |                          |
|                               | 54                               | 63.2                                 | 1.38                                 | Lowe (1996)               |                          |
|                               | 56                               | 73.7                                 | 1.16                                 | Lowe (1996)               |                          |
|                               | 58                               | 57.4                                 | 1.31                                 | Lowe (1996)               |                          |
|                               | 58                               | 56.8                                 | 0.99                                 | Lowe (1996)               |                          |
|                               | 54                               | 76.8                                 | 0.98                                 | Lowe (1996)               |                          |
|                               | 52                               | 80                                   | 1.42                                 | Lowe (1996)               |                          |
|                               | 64                               | 18                                   | 1.55                                 | Lowe (1998)               |                          |
|                               | 38                               | 18                                   | 0.47                                 | Holland et al. (1993)     |                          |
|                               | <i>Triakis semifasciata</i>      | 35                                   | 65                                   | 1.86                      | Graham et al. (1990)     |
|                               |                                  | 36                                   | 54.5                                 | 1.56                      | Graham et al. (1990)     |
|                               |                                  | 36                                   | 46.8                                 | 1.3                       | Graham et al. (1990)     |
| 38                            |                                  | 43.2                                 | 1.14                                 | Graham et al. (1990)      |                          |
| 38                            |                                  | 57.8                                 | 1.52                                 | Graham et al. (1990)      |                          |
| 39                            |                                  | 48.4                                 | 1.24                                 | Graham et al. (1990)      |                          |
| 47                            |                                  | 49.6                                 | 1.06                                 | Graham et al. (1990)      |                          |
| 52                            |                                  | 90.5                                 | 1.74                                 | Graham et al. (1990)      |                          |
| 56                            |                                  | 90.2                                 | 1.61                                 | Graham et al. (1990)      |                          |
| 58                            |                                  | 96.9                                 | 1.67                                 | Graham et al. (1990)      |                          |
| 68                            |                                  | 96.3                                 | 1.42                                 | Graham et al. (1990)      |                          |
| 71                            |                                  | 49.9                                 | 0.7                                  | Graham et al. (1990)      |                          |
| 71                            |                                  | 69.2                                 | 0.98                                 | Graham et al. (1990)      |                          |
| 71                            |                                  | 89.3                                 | 1.26                                 | Graham et al. (1990)      |                          |
| 77                            |                                  | 89                                   | 1.16                                 | Graham et al. (1990)      |                          |
| <i>Isurus oxyrinchus</i>      | 103                              | 89.3                                 | 0.87                                 | Graham et al. (1990)      |                          |
|                               | 110                              | 65.9                                 | 0.6                                  | Graham et al. (1990)      |                          |
|                               | 121                              | 76.4                                 | 0.63                                 | Graham et al. (1990)      |                          |
|                               | 91                               | 14                                   | 0.15                                 | Ackerman et al. (2000)    |                          |
|                               | 115                              | 72.2                                 | 0.63                                 | Sepulveda et al. (2004)   |                          |
|                               | 115 FL                           | 55.6                                 | 0.48                                 | Sepulveda et al. (2004)   |                          |
|                               | 120 FL                           | 66.7                                 | 0.56                                 | Sepulveda et al. (2004)   |                          |
|                               | 125 FL                           | 41.7                                 | 0.33                                 | Sepulveda et al. (2004)   |                          |
|                               | 83 FL                            | 59.7                                 | 0.72                                 | Sepulveda et al. (2004)   |                          |
|                               | 145 FL                           | 88.9                                 | 0.61                                 | Sepulveda et al. (2004)   |                          |
|                               | 80 FL                            | 44.4                                 | 0.56                                 | Sepulveda et al. (2004)   |                          |
|                               | 119                              | 90                                   | 0.8                                  | Klimley et al. (2002)     |                          |
|                               | 142                              | 120                                  | 0.8                                  | Klimley et al. (2002)     |                          |
|                               | 135                              | 70                                   | 0.5                                  | Klimley et al. (2002)     |                          |
|                               | 136                              | 67                                   | 0.49                                 | Carey et al. (1981)       |                          |
| 170                           | 31                               | 0.18                                 | Holts & Bedford (1993)               |                           |                          |
| <i>Carcharodon carcharius</i> | 500                              | 74                                   | 0.148                                | Gunn et al. (1999)        |                          |
|                               | 152                              | 80                                   | 0.53                                 | Klimley et al. (2001)     |                          |
|                               | 300                              | 89                                   | 0.29                                 | Strong et al. (1992)      |                          |
|                               | 500                              | 89                                   | 0.18                                 | Strong et al. (1992)      |                          |
|                               | 460                              | 89                                   | 0.19                                 | Carey et al. (1982)       |                          |
| <i>Prionace glauca</i>        | 370                              | 64                                   | 0.17                                 | Goldman & Anderson (1999) |                          |
|                               | 150                              | 60                                   | 0.4                                  | Klimley et al. (2002)     |                          |
|                               | 150                              | 30                                   | 0.2                                  | Klimley et al. (2001)     |                          |
|                               | 260                              | 42                                   | 0.16                                 | Sciarotta & Nelson (1977) |                          |
| <i>Negaprion brevirostris</i> | 200                              | 42                                   | 0.21                                 | Carey et al. (1990)       |                          |
|                               | 70                               | 76.4                                 | 1.09                                 | Graham et al. (1990)      |                          |
|                               | 150                              | 53                                   | 0.35                                 | Gruber et al. (1988)      |                          |
| <i>Carcharhinus</i>           | 180                              | 33                                   | 0.18                                 | Sundstom et al. (2001)    |                          |
|                               | <i>amblyrhyncos</i>              | 130                                  | 69                                   | 0.53                      | Mckibben & Nelson (1986) |
|                               | <i>obscurus</i>                  | 65                                   | 22                                   | 0.34                      | Huish & Benedict (1978)  |
|                               | <i>plumbeus</i>                  | 71                                   | 34                                   | 0.48                      | Medved & Marshall (1983) |
|                               | <i>acus</i>                      | 120                                  | 23.5                                 | 0.19                      | Yano Tanaka (1986)       |
|                               | <i>galeocerdo cuvier</i>         | 420                                  | 107                                  | 0.25                      | Holland et al. (1999)    |
|                               |                                  | 400                                  | 100                                  | 0.25                      | Tricas et al. (1981)     |
|                               | <i>hexanchus griseus</i>         | 380                                  | 20                                   | 0.05                      | Carey & Clark (1995)     |
|                               | <b>Bony fishes</b>               |                                      |                                      |                           |                          |
|                               | <i>Thunnus albacares</i>         | 28                                   | 52                                   | 1.85                      | Blake et al. (2005)      |
| 28                            |                                  | 52                                   | 1.85                                 | Blake et al. (2005)       |                          |
| 28                            |                                  | 56                                   | 2                                    | Blake et al. (2005)       |                          |
| 31                            |                                  | 60                                   | 1.93                                 | Blake et al. (2005)       |                          |
| 31                            |                                  | 61                                   | 1.96                                 | Blake et al. (2005)       |                          |
| 35                            |                                  | 67                                   | 1.91                                 | Blake et al. (2005)       |                          |
| <i>Thunnus orientalis</i>     | 76                               | 76                                   | 1                                    | Blank et al. (2007)       |                          |

|                                                 |        |        |       |                                |
|-------------------------------------------------|--------|--------|-------|--------------------------------|
| <i>Thunnus obesus</i>                           | 36     | 49     | 1.36  | Blake et al. (2005)            |
|                                                 | 55     | 60     | 1.09  | Blake et al. (2005)            |
|                                                 | 36     | 76     | 2.11  | Blake et al. (2005)            |
| <i>Auxis rochei</i>                             | 31     | 68     | 2.19  | Blake et al. (2005)            |
| <i>Katsuwonus pelamis</i>                       | 39     | 84     | 2.15  | Blake et al. (2005)            |
|                                                 | 38     | 59     | 1.55  | Blake et al. (2005)            |
|                                                 | 51     | 51     | 1     | Blake et al. (2005)            |
|                                                 | 38     | 57     | 1.5   | Blake et al. (2005)            |
|                                                 | 48     | 72     | 1.5   | Blake et al. (2005)            |
| <i>Eutynnus affinis</i>                         | 60     | 186    | 3.1   | Blake et al. (2005)            |
|                                                 | 26     | 30     | 1.15  | Blake et al. (2005)            |
|                                                 | 26     | 40     | 1.54  | Blake et al. (2005)            |
|                                                 | 38     | 51.6   | 1.36  | Blake et al. (2005)            |
| <i>Megalops cyprinoides</i>                     | 26.2   | 17.03  | 0.65  | Seymore et al. (2007)          |
| <i>Gadus morhua</i>                             | 46.5   | 20     | 0.43  | Dutil et al. (2007)            |
| <i>Catostomus commersonii</i>                   | 39.3   | 93.53  | 2.38  | Castro-Santos (2005)           |
| <i>Morone saxatilis</i>                         | 51.6   | 132    | 2.56  | Castro-Santos (2005)           |
| <i>Stizostedion vitreum</i>                     | 31.9   | 77.84  | 2.44  | Castro-Santos (2005)           |
| <i>Pollachius virens</i>                        | 25     | 93     | 3.72  | Pederson (2001)                |
| <i>Gomphosus varius</i>                         | 12.4   | 15     | 1.21  | Westneat & Walker (1997)       |
| subadult <i>Acipenser medirostris</i>           | 104    | 80     | 0.77  | Kelly et al. (2007)            |
| <b>Filter feeders (including elasmobranchs)</b> |        |        |       |                                |
| <i>Megachasma pelagios</i>                      | 490    | 32     | 0.07  | Nelson et al. (1997)           |
| <i>Rhincodon typus</i>                          | 400    | 32.8   | 0.082 | Hsu Hsun (2007)                |
| <i>Rhincodon typus</i>                          | 450    | 40     | 0.09  | Hsu Hsun (2007)                |
| <i>Cetorhinus maximus</i>                       | 1000   | 85     | 0.09  | Sims (2000)                    |
| <i>Cetorhinus maximus</i>                       | 700    | 45     | 0.06  | Priede (1984)                  |
| <i>Cyprius carpio</i>                           | 5.31   | 38     | 7.16  | Tudorache et al. (2007)        |
| <i>Cyprius carpio</i>                           | 10     | 45     | 4.5   | Tudorache et al. (2007)        |
| <i>Cyprius carpio</i>                           | 19.8   | 45     | 2.27  | Tudorache et al. (2007)        |
| <i>Cyprius carpio</i>                           | 26.2   | 45     | 1.72  | Tudorache et al. (2007)        |
| <i>Anchoa spp</i>                               | 5      | 53     | 7.3   | Taylor et al. (2007)           |
| <i>Menidia menidia</i>                          | 63     | 66     | 1.05  | Hartwell & Otto (1991)         |
| <i>Mallotus villosus</i>                        | 18.5   | 18.5   | 1     | Behrens et al. (2006)          |
| <i>Alosa sapidissima</i>                        | 42.8   | 43.22  | 1.01  | Leonard et al. (1999)          |
| <i>Alosa sapidissima</i>                        | 40.1   | 45.714 | 1.14  | Leonard et al. (1999)          |
| <i>Alosa sapidissima</i>                        | 41.775 | 41.775 | 1     | Castro-Santos (2005)           |
| <b>Freshwater fish</b>                          |        |        |       |                                |
| <i>Siluris glanis</i>                           | 9.2    | 1.56   | 0.17  | Zamora & Garcia-Berthou (2007) |

BL, body lengths.

## References

- Behrens, J.W., Præbel, K., and Steffensen, J.F. (2006). *J. Exp. Mar. Biol.* **331**: 208-216.
- Blake, R.W., Chan, K.H.S. and Kwok, E.W.Y. (2005). Finlets and the steady swimming performance of *Thunnus albacares*. *J. Fish Biol.* **67**: 1434-1445.
- Blank, J.M., Morrissette, J.M., Farwell, C.J., Price, M., Schallert, R.J., and Block, B. A. (2007). Temperature effects on metabolic rate of juvenile Pacific bluefin tuna *Thunnus orientalis*. *J. Exp. Biol.* **210**: 4254-4261.
- Carey, F.G., Kanwisher, J.W., Brazier, O., Gabrielson, G., Casey, J.G., and Pratt, H.L., (1982). Temperature and activities of a white shark, *Carcharodon carcharias*. *Copeia*. **1982**(2): 254-260.
- Carey, F.G. and Clark, E. (1995). Depth telemetry from the sixgill shark, *Hexanchus griseus*, at Bermuda. *Environ. Biol. Fishes.* **42**: 7-14.
- Carey, F.G., Scharold, J.V. and Kalmijn, A.J. (1990). Movement of bule sharks (*Prionace glauca*) in depth and course. *Mar. Biol.* **106**:3, 329-342.
- Castro-Santos, T. (2005). Optimal swim speeds for traversing velocity barriers: an analysis of volitional high-speed swimming behavior of migratory fishes. *J. Exp. Biol.* **208**: 421-432.
- Dutil, J.D., Sylvestre, E.L., Gamache, L., Larocque, R., and Guderley, H. (2007). Burst and coast use, swimming performance and metabolism of Atlantic cod *Gadus morhua* in sub-lethal hypoxic conditions. *J. Fish Biol.* **71**: 363-375.
- Goldman, K.J. and Anderson, S.D. (1999). Space utilization and swimming depth of white sharks, *Carcharodon carcharias*, at the South Farallon Islands, Central California. *Environ. Biol. Fishes.* **56**:4, 351-364.
- Graham, J.B., Dewar, H., Lai, N.C., Lowell, W.R. and Arce, S.M. (1990). Aspects of shark swimming performance using a large water tunnel. *J. Exp. Biol.* **151**: 175-192.
- Gruber, S.H., Nelson, D.R. and Morrissey, J.F. (1988). Patterns of activity and space utilization of lemon sharks, *Negaprion brevirostris*, in a shallow Bahamian lagoon. *Bulletin of Mar. Sci.* **43**(1): 61-76.
- Hartwell, S.I. and Otto, R.G. (1991). Critical swimming capacity of the Atlantic Silverside, *Menidia menidia* L. *Estuaries.* **14**:2. 218-221.
- Holland, K.N., Wetherbee, B.M., Lowe, C.G. and Meyer, C.G. (1999). Movements of tiger sharks (*Galeocerdo cuvier*) in coastal Hawaiian waters. *Mar. Biol.* **134**: 665-673.
- Hsu, H. H., Joung, S.J., Liao, Y.Y., Liu, K.M. (2007). Satellite tracking of juvenile whale sharks, *Rhincodon typus*, in the Northwestern Pacific. *Fisheries Research.* **84**: 25-31.
- Huish, M.T. and C. Benedict. (1978). Sonic tracking of dusky sharks in the Cape Fear River, North Carolina. *J. Elisha Mitchell Sci. Soc.* **93**: 21–26.
- Kelly, J.T., Klimley, A.P., and Crocker, C.E. (2007). Movements of green sturgeon, *Acipenser medirostris*, in the San Francisco Bay estuary, California. *Environ. Biol. Fishes.* **79**: 281-295.
- Klimley, A.P., Beavers, S.C., Curtis, T.H. and Jorgensen, S.J. (2002). Movements and swimming behavior of three species of sharks in La Jolla Canyon, California. *Environ. Biol. Fishes.* **63**: 117-135.
- Leonard, J.B.K., Norieka, J.F., Kynard, B. and McCormick, S.D. (1999). Metabolic rates in an anadromous clupeid, the American shad (*Alosa sapidissima*). *J. Comp. Physiol. B.* **169**: 287-295.
- Lowe, C.G. (1996). Kinematics and critical swimming speed of juvenile scalloped hammerhead sharks. *J. Exp. Biol.* **199**: 2605-2610.
- McKibben, J.N. & D.R. Nelson. (1986). Patterns of movement and grouping of gray reef sharks, *Carcharhinus amblyrhynchos*, at Enewetak, Marshall Islands. *Bull. Mar. Sci.* **38**: 89–110

- Medved, R.J. & J.A. Marshall. (1983). Short-term movements of young sandbar sharks, *Carcharhinus plumbeus* (Pisces, *Carcharhinidae*). *Bull. Mar. Sci.* **33**: 87–93.
- Nelson, D.R., McKibben, J.N. Strong, W.R., Lowe, C.G. and Sisneros, J. (1997). An acoustic tracking of a megamouth shark, *Megachasma pelagios*: a crepuscular vertical migratory. *Envir. Biol. Fishes.* **49**: 389-399.
- Pederson, J. (2001). Hydroacoustic measurement of swimming speed of North Sea saith in the field. *J. Fish Biol.* **58**: 1073-1085.
- Priede, I.G. (1984). A basking shark (*Cetorhinus maximus*) tracked by satellite together with simultaneous remote sensing. *Fisheries Research.* **2**:3 201-216.
- Sciarrotta, T.C. & D.R. Nelson. (1977). Diel behavior of the blue shark, *Prionace glauca*, near Santa Catalina Island, California. *U.S. Fish. Bull.* **75**: 519–528.
- Sepulveda, C.A., Kohin, S., Chan, C., Vetter, R., and Graham, J.B. (2004). Movement patterns, depth preferences, and stomach temperatures of free-swimming juvenile mako sharks, *Isurus oxyrinchus*, in the Southern California Bight. *Mar Biol.* **145**: 191-199.
- Seymore, R.S., Farrell, A.P. Christian, K., Clark, T.D., Bennett, M.B., Wells, R.M.G., and Bladwin, J. (2007). Continuous measurement of oxygen tensions in the air-breathing organ of Pacific tarpon (*Megalops cyprinoides*) in relation to aquatic hypoxia and exercise. *J. Comp. Physiol B.* **177**: 579-587.
- Sims, D.W. (2000). Filter-feeding and cruising swimming speeds of basking sharks compared with optimal models: they filter-feed slower than predicted for their size. *J. Exp. Mar. Biol.* **249**: 65-76.
- Strong, W.R., Murphy, R.C. Bruce, B.D. and Nelson, D.R. (1992). Movements and associated observations of bait-attracted white sharks, *Carcharodon carcharias*: A preliminary report. *Mar. and Freshwater Research.* **43**(1): 13-20.
- Sundstom, L.F., Gruber, S.H., Clermont, S.M., Correia, J.P.S., de Marniac, J.R.C., Morrissey, J.F., Lowrance, C.R. Thomassen, L., and Oliveira, M.T. (2001). Review of elasmobranch behavioral studies using ultrasonic telemetry with special reference to the lemon shark, *Negaprion brevirostris*, around Bimini Islands, Bahamas. *Envir Biol Fishes.* **60**: 225-250.
- Taylor, J.C., Rand, P.S. and Jenkins, J. (2007). Swimming behavior of juvenile anchovies (*Anchoa spp.*) in an episodically hypoxic estuary: implications for individual energetics and trophic dynamics. *Mar. Biol.* **152**: 939-957.
- Tricas, T.C., Taylor, L.R. and Natfel, G. (1981). Diel behavior of the tiger shark, *Galeocerdo cuvier*, at French Frigate Shoals, Hawaiian Islands, *Copeia.* **1981**(4): 904-908.
- Tudorache, C. Viaenen, P. Blust, R. and De Boeck, G. (2007). Longer flumes increase critical swimming speeds by increasing burst-glide swimming duration in carp *Cyprinus carpio*, L. *J. Fish Biol.* **71**: 1630-1638.
- Westneat, M.W. and Walker, J.A. (1997). Motor patterns of Labriform locomotion: kinematic and electromyographic analysis of pectoral fin swimming in the Labrid fish *Gomphosus varius*. *J. Exp. Biol.* **200**: 1881-1893.
- Yano, K. and Tanaka, S. (1986). A telemetric study on the movements of the deep sea squaloid shark; *Centrophorus acus*. In Proceedings of Second International Conference on Indo Pacific Fishes (Arai; R.; ed.); 372–380. Tokyo: Tokyo National Museum.
- Zamora, C.J., and Garcia-Berthou, E. (2007). Preliminary telemetry data on the movement patterns and habitat use of European catfish (*Silurus glanis*) in a reservoir of the River Ebro, Spain. *Ecol Freshwater Fish.* **16**: 450-456.
